# Supplementary material for: A plasmonic nano-antenna with controllable resonance frequency: Cu1.94S–ZnS dimeric nanoheterostructure synthesized in solution
Source: Royal Society of Chemistry journal article supplement (doi:10.1039/c2jm34239a), 2012-01-01
Supplement: c2jm34239a.pdf [file c2jm34239a.pdf]

## Electronic Supplementary Information

### A Plasmonic Nano-antenna With Controllable Resonance Frequency: Cu<sub>1.94</sub>S-ZnS Dimeric Nanoheterostructure Synthesized in Solution

Feng Huang, Xiaolei Wang, Ju Xu, Daqin Chen, Yuansheng Wang\*

#### 1. Detailed calculation of $R$ and $L$ values

To figure out the value of  $R$  and  $L$ , following constants for Cu<sub>1.94</sub>S is obtained from references<sup>1-3</sup>

$$\nu_h = 1.06 \times 10^{15} \text{ s}^{-1}, m_h = 0.8m_0 = 7.2 \times 10^{-31} \text{ kg}$$
$$h = 1.6 \times 10^{-19} \text{ C}, N_h = 1.0 \times 10^{27} \text{ m}^{-3}$$

Considering that the Cu<sub>1.94</sub>S nanospheres have mean diameter of  $\delta \sim 18$  nm, the values of  $R$  and  $L$  can be figured out as following:

$$R = \frac{m_h \nu_h}{h^2 \delta N_h} = 1.46 \text{ k}\Omega$$
$$L = \frac{m_h}{h^2 \delta N_h} = 1.56 \text{ p}H$$

#### 2. Detailed deviation of equation (5) in the main text

Light absorbance measurements are carried out by detecting the intensity of light that transmits through the colloid solution containing the Cu<sub>1.94</sub>S-ZnS nanoheterostructure, as demonstrated in Figure S1. The absorption coefficient  $A$  is determined by the following equation:

$$\frac{I}{I_0} = \exp(-A)$$

where  $I_0$  and  $I$  represent intensity of the incident and transmitted light respectively. Following Lambert's law, the absorption coefficient  $A$  could be described as:

$$A = \alpha nd$$

where  $\alpha$  is the extinction cross-section of an individual nanoparticle,  $n$  the concentration of nanoparticles,  $d$  the transmission distance. In present work,  $\alpha$  is the sum of scattering cross-section ( $s_0$ ) and absorption cross-section ( $h_0$ ) of an individual nano-antenna, i.e.,  $\alpha = s_0 + h_0$ . Since the concentration of colloid is low and the interactions between nanoparticles are therefore weak,  $h_0$  could be regarded proportional to the frequency dependent response  $H$

of the nano-antenna, i.e.,  $h_0 \propto H(\lambda)$ , while  $s_0$  is a constant. Hence, the absorption coefficient  $A$  is wavelength  $\lambda$  dependent, and Equation (6) is converted to:

$$A(\lambda) = \alpha nd = s_0 nd + h_0 nd = S + NH(\lambda)$$

$$A(\lambda) = S + \frac{NR^2}{R^2 + \left(\frac{2\pi c_0}{\lambda} L - \frac{\lambda}{2\pi c_0 C}\right)^2}$$

where  $N$  represents a parameter related to the amount of nano-antennas and  $S$  denotes the scattering loss of nanoheterostructure in solution.

### 3. Figure S1-S5

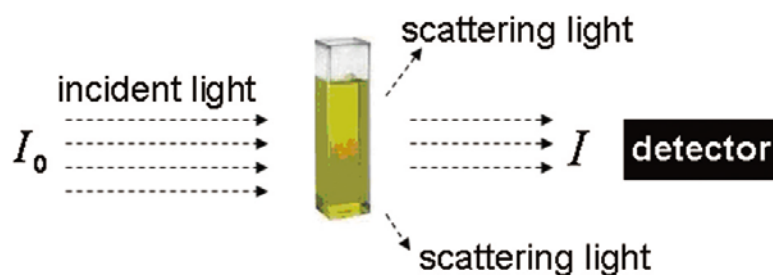

Figure S1 Schematic illustration of light absorbance measurement.

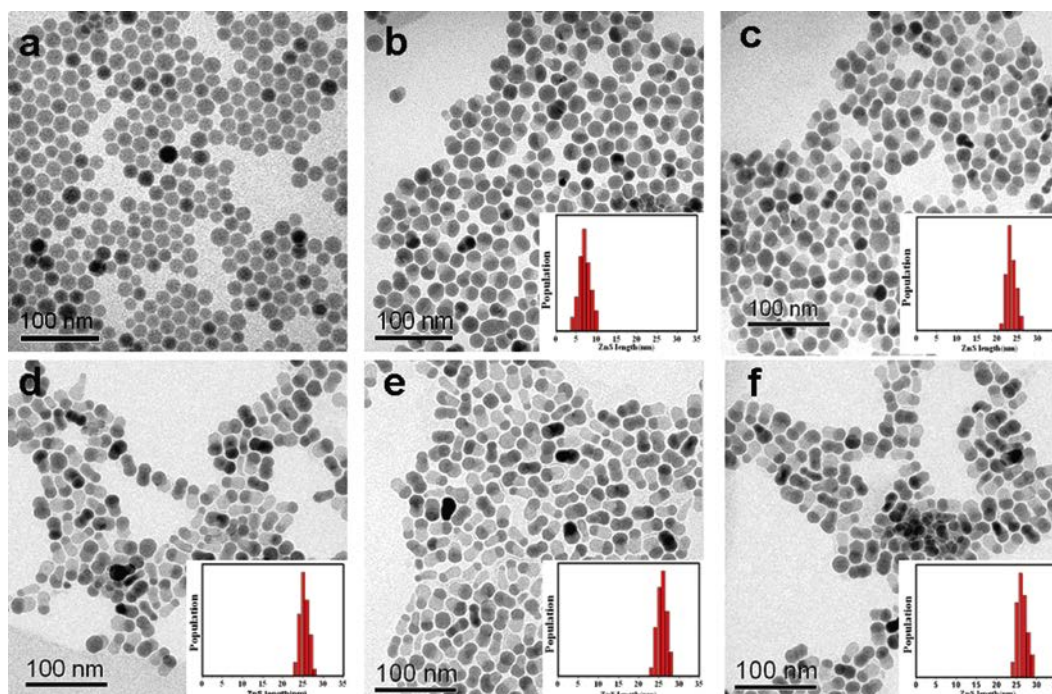

Figure S2 TEM micrographs of Cu<sub>1.94</sub>S nanosphere precursors (a), and Cu<sub>1.94</sub>S-ZnS nanoheterostructures having reacted for 5 min (b), 15 min (c), 20 min (d), 25 min (e), and 30 min (f) respectively; insets are the histograms showing ZnS length distributions by measuring 100 nanoheterostructures lying horizontally.

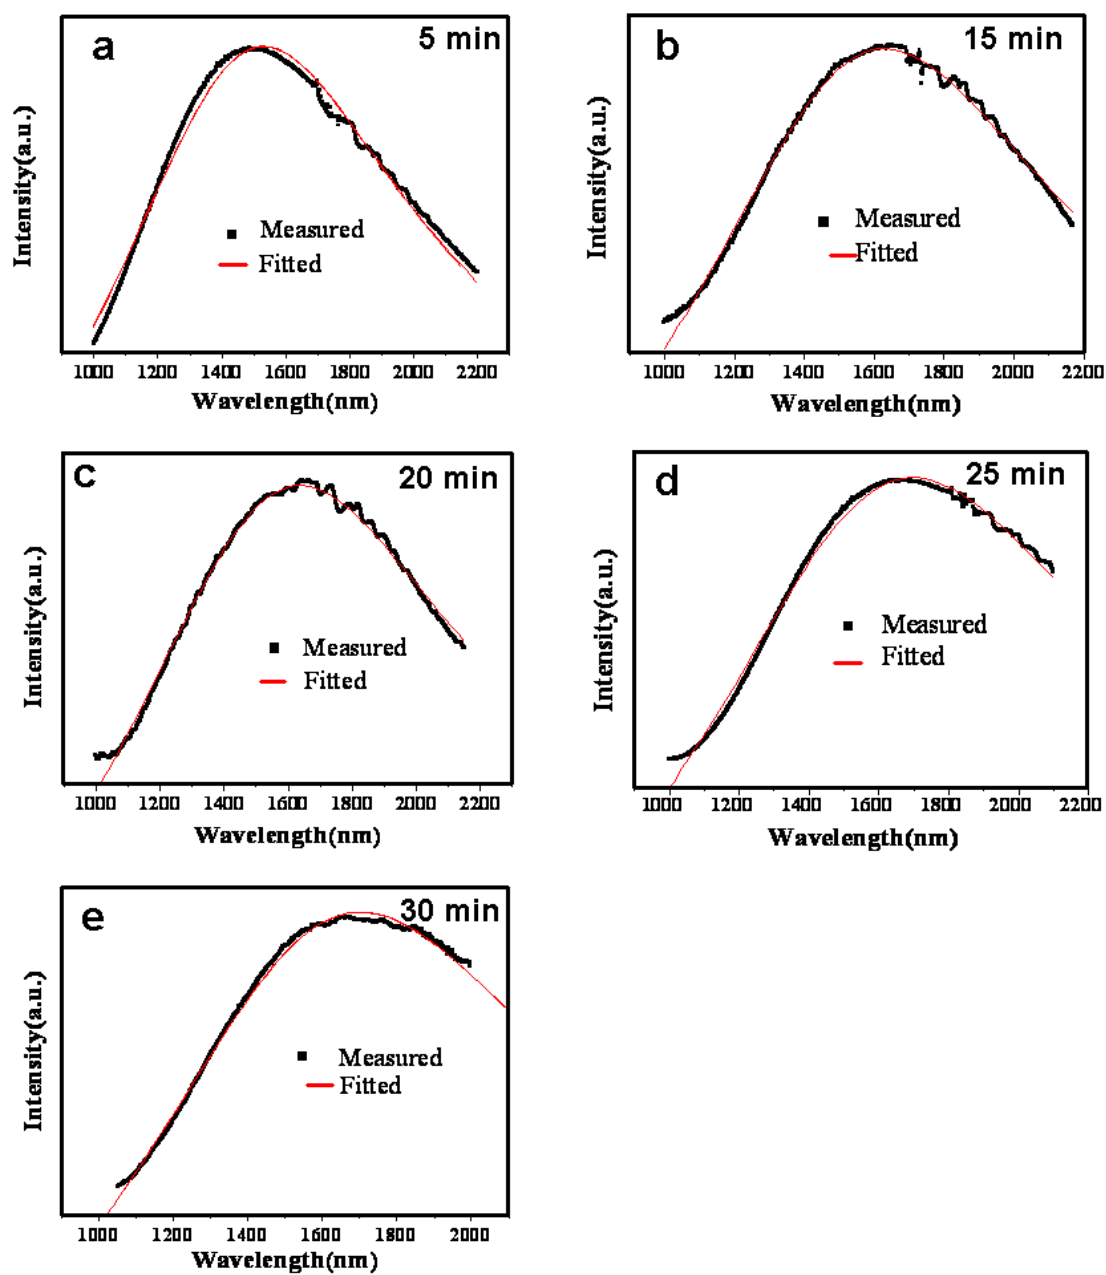

Figure S3 Measured and fitted LSPR absorption spectra of Cu<sub>1.94</sub>S-ZnS nanoheterostructures having reacted for 5 min (a), 15 min (b), 20 min (c), 25 min (d), and 30 min (e), respectively.

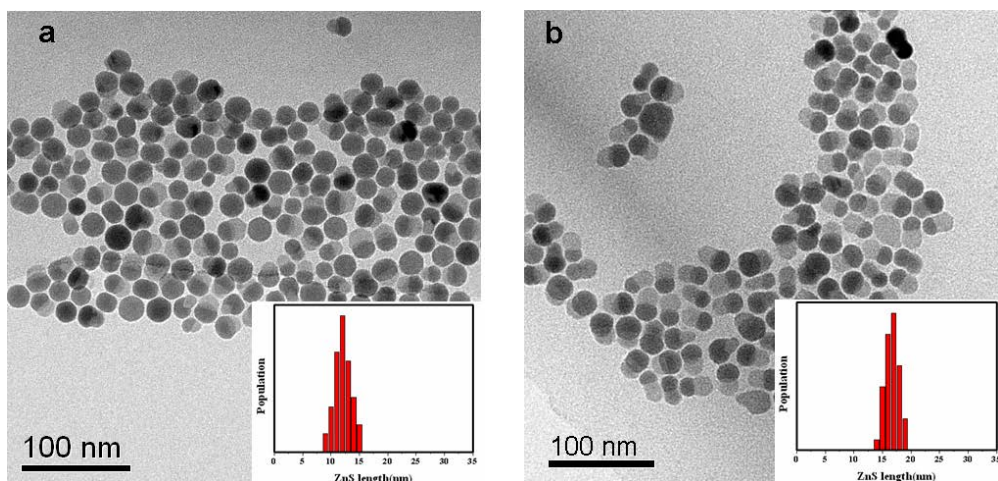

Figure S4 TEM micrographs of the  $\text{Cu}_{1.94}\text{S}$ -ZnS nanoheterostructures having reacted for 8 min (a), and 12 min (b) respectively; insets are the histograms showing ZnS length distributions by measuring 100 nanoheterostructures lying horizontally.

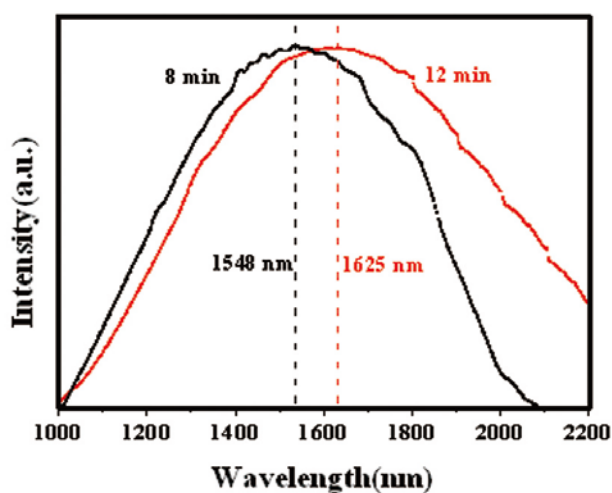

Figure S5 Absorption spectra of the  $\text{Cu}_{1.94}\text{S}$ -ZnS nanoheterostructures having reacted for 8 min and 12 min respectively.

### References:

1. Y. B. He, A. Polity, I. O. sterreicher, D. Pfisterer, R. Gregor, B.K. Meyera, M. Hardt, *Physica B* 2001 308–310, 1069–1073
2. Y. Choi, D. Choi, L.P. Lee, *Adv. Mater.* 2010, 22, 1754–1758
3. J. M. Luther, P. K. Jain, T. Ewers, A. P. Alivisatos, *Nat. Mater.* **2011**, 11, 361–366.
